# Supplementary material for: Electrocatalytic oxygen evolution activity of surfactant-free cobalt- and manganese-based spinel oxide nanoparticles in acid
Source: Royal Society of Chemistry journal article supplement (doi:10.1039/d3nj03695b), 2023-01-01
Supplement: d3nj03695b1.pdf [file d3nj03695b1.pdf]

## Supporting Information

# Electrocatalytic Oxygen Evolution Activity of Surfactant-free Cobalt- and Manganese-based Spinel Oxide Nanoparticles in Acid

Jiajie Liu<sup>a\*</sup>; Yvpei Li<sup>a</sup>; Jingguo Du<sup>b</sup>; Rongrong Cao<sup>c</sup>; Zhihao Zeng<sup>d</sup>; Chuanqing Huang<sup>a</sup>; Chao Wang<sup>a, e\*</sup>

<sup>a</sup> College of Chemistry and Chemical Engineering, Shaanxi Key Laboratory of Chemical Additives for Industry, Ministry of Education, Shaanxi University of Science & Technology, Xi'an 710021, China;

<sup>b</sup> Hebei Province Mining Area Ecology Restoration Industry Technology Research Institute, North China University of Science and Technology, Tangshan 063210, China;

<sup>c</sup> Oil and Gas Technology Research Institute, Changqing Oilfield Branch Company, CNPC, Xi'an, 710018, China

<sup>d</sup> Engineering Technology Research Institute of Petrochina Southwest Oil & Gasfield Company, Chengdu, 610017, China.

<sup>e</sup> Shaanxi Collaborative Innovation Center of Industrial Auxiliary Chemistry & Technology, The Youth Innovation Team of Shaanxi Universities, Shaanxi University of Science and Technology, Xi'an, Shaanxi 710021, P. R. China

\*Corresponding author.

E-mail address: liujiajie@sust.edu.cn

cwang@sust.edu.cn

1. Experimental
2. Instrumentation
3. X-ray photoelectron spectroscopy
4. X-ray diffraction
5. EDS and ICP-AES
6. Electrochemistry
7. Activity comparison
8. TEM
9. References

## 1. Experimental

### Chemicals

Cobalt(II) tetrahydrate ( $\text{Co}(\text{ac})_2 \cdot 4\text{H}_2\text{O}$ ; Hongyan Chemical Reagent; AR 99.5%), manganese acetate tetrahydrate ( $\text{Mn}(\text{ac})_2 \cdot 4\text{H}_2\text{O}$ ; Damao Chemical Reagent; AR 99.0%), ferric chloride hexahydrate ( $\text{FeCl}_3 \cdot 6\text{H}_2\text{O}$ ; Kemiou Chemical Reagent; AR 99.0%), ethanol absolute ( $\text{CH}_3\text{CH}_2\text{OH}$ ; Guanghai Chemical Reagent; AR 99.7%), ammonia solution ( $\text{NH}_3 \cdot \text{H}_2\text{O}$ ; Guanghai Chemical Reagent; AR 25-28%), carbon paper were used as received unless stated otherwise. Doubly distilled water was used throughout the experiment.

## 2. Instrumentation

X-ray photoelectron spectroscopy (XPS) was carried out using a Kratos Axis Supra spectrometer at room temperature and ultra-high vacuum (UHV) conditions. The instrument was equipped with monochromatic Al K $\alpha$  source 1486.6 eV (15 mA, 15 kV), and hemispherical analyser with hybrid magnetic and electrostatic lens for enhanced electron collection. Survey and detailed XPS spectra were acquired at normal emission with the fixed pass energy of 160 eV and 40 eV, respectively. All spectra were charge-corrected to the hydrocarbon peak set to 284.6 eV. The Kratos charge neutralizer system was used on all specimens. Data analysis was based on a standard deconvolution method using mixed Gaussian (G) and Lorentzian (L) line shape (G = 70% and L = 30%, Gaussian–Lorentzian product) for each component. Spectra were analyzed using CasaXPS software (version 2.3.16). X-ray diffraction (XRD) was acquired using (D8 ADV ANCE, Bruker) diffractometer having Cu K $\alpha$  ( $\lambda=1.54 \text{ \AA}$ ) source. The instrument was operated at 30 mA current voltage and 40 kV. Field emission scanning electron microscope (S-4800, Hitachi, Japan) and transmission electron microscope (FEI-Tecnai G2 F20) were used to observe the morphology of the catalyst. ICP-AES parameters are the following: forward power 1350 W, plasma gas flow rate 12.0 L min<sup>-1</sup>, nebulizer gas flow rate 1.0 L min<sup>-1</sup>, auxiliary gas flow rate 1.0 L min<sup>-1</sup>, sample uptake speed 50 rpm with white/orange Tygon tubing. A concentric nebulizer was used with a cyclonic spray chamber. No internal standard correction was applied for ICP-AES analysis.

### 3. X-ray photoelectron spectroscopy

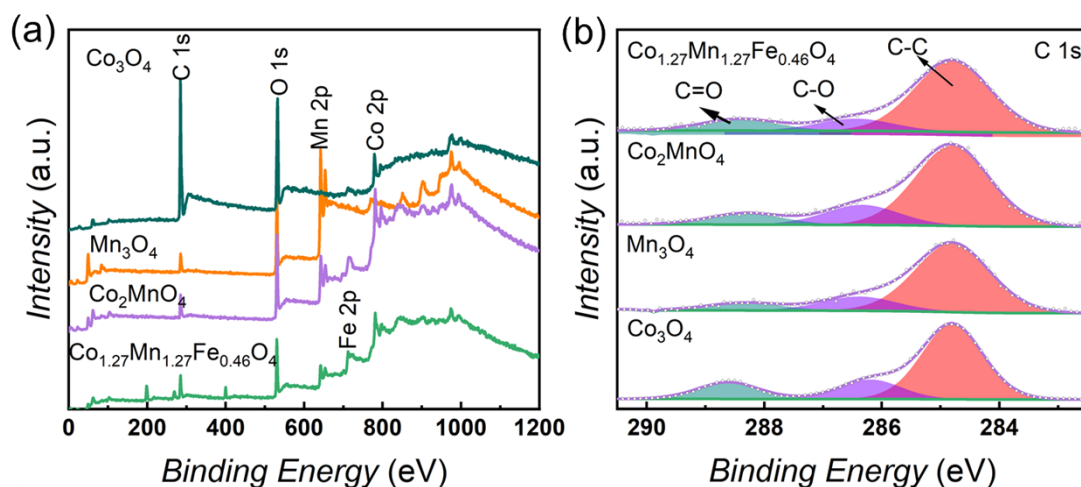

**Figure S1.** (a) XPS survey spectra of the  $\text{Co}_3\text{O}_4$ ,  $\text{Mn}_3\text{O}_4$ ,  $\text{Co}_2\text{MnO}_4$  and  $\text{Co}_{1.27}\text{Mn}_{1.27}\text{Fe}_{0.46}\text{O}_4/\text{CP}$ ; (b) Deconvoluted high-resolution XPS spectra of the C 1s region of  $\text{Co}_3\text{O}_4$ ,  $\text{Mn}_3\text{O}_4$ ,  $\text{Co}_2\text{MnO}_4$  and  $\text{Co}_{1.27}\text{Mn}_{1.27}\text{Fe}_{0.46}\text{O}_4/\text{CP}$ .

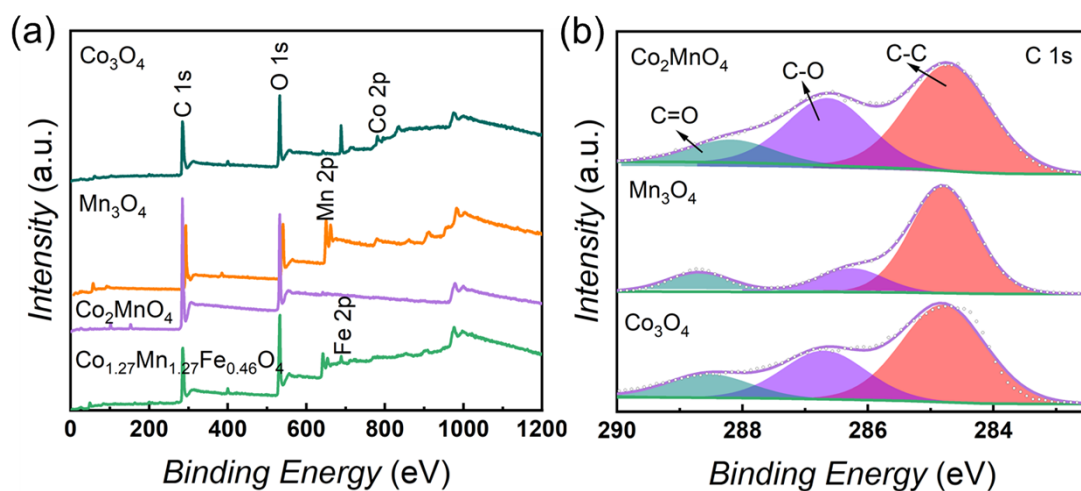

**Figure S2.** (a) XPS survey spectra of the  $\text{Co}_3\text{O}_4$ ,  $\text{Mn}_3\text{O}_4$ ,  $\text{Co}_2\text{MnO}_4$  and  $\text{Co}_{1.27}\text{Mn}_{1.27}\text{Fe}_{0.46}\text{O}_4/\text{CP}$  after the long-term galvanostatic test; (b) Deconvoluted high-resolution XPS spectra of the C 1s region of  $\text{Co}_3\text{O}_4$ ,  $\text{Mn}_3\text{O}_4$ ,  $\text{Co}_2\text{MnO}_4$  and  $\text{Co}_{1.27}\text{Mn}_{1.27}\text{Fe}_{0.46}\text{O}_4/\text{CP}$  after the long-term galvanostatic test.

#### 4. X-ray diffraction

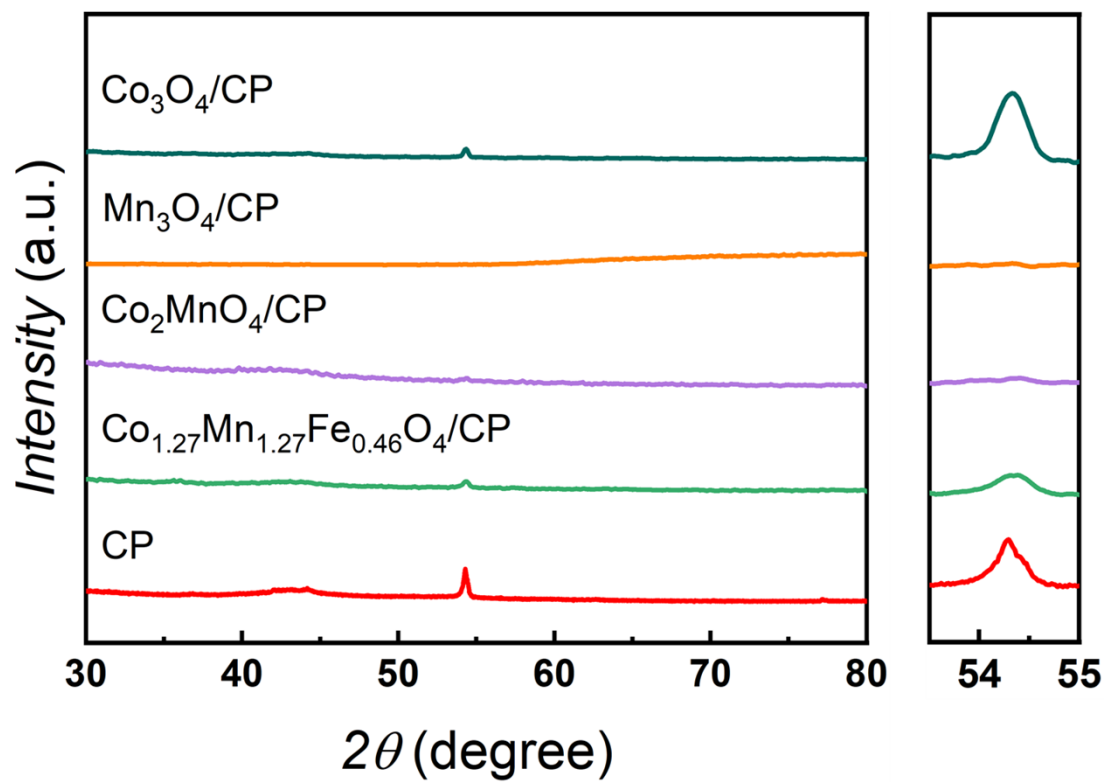

**Figure S3.** XRD patterns of the  $\text{Co}_3\text{O}_4$ ,  $\text{Mn}_3\text{O}_4$ ,  $\text{Co}_2\text{MnO}_4$ ,  $\text{Co}_{1.27}\text{Mn}_{1.27}\text{Fe}_{0.46}\text{O}_4/\text{CP}$  and carbon paper after long-term galvanostatic test.

## 5. EDS and ICP-AES

Table S1. Contents of the spinel-type oxides

|                                                                         |         | Atomic Percentage (%) |       |       |       |
|-------------------------------------------------------------------------|---------|-----------------------|-------|-------|-------|
|                                                                         |         | Co                    | Mn    | Fe    | O     |
| Co <sub>3</sub> O <sub>4</sub>                                          | EDS     | 39.56                 | -     | -     | 60.44 |
| Mn <sub>3</sub> O <sub>4</sub>                                          | EDS     | 38.43                 | -     | -     | 61.57 |
| Co <sub>2</sub> MnO <sub>4</sub>                                        | EDS     | 21.74                 | 17.38 | -     | 60.88 |
| Co <sub>1.27</sub> Mn <sub>1.27</sub> Fe <sub>0.46</sub> O <sub>4</sub> | ICP-AES | 41.74                 | 42.93 | 15.34 | -     |
|                                                                         | EDS     | 16.39                 | 15.31 | 7.89  | 60.41 |

Table S2. The amounts of elements dissolved into the electrolytes after long-term

OER

|                         | ICP-AES                                                                 | Co    | Mn    | Fe    |
|-------------------------|-------------------------------------------------------------------------|-------|-------|-------|
| Dissolved<br>mass (mg)  | Co <sub>3</sub> O <sub>4</sub>                                          | 0.692 | -     | -     |
|                         | Mn <sub>3</sub> O <sub>4</sub>                                          | -     | 0.690 | -     |
|                         | Co <sub>2</sub> MnO <sub>4</sub>                                        | 1.022 | 0.595 | -     |
|                         | Co <sub>1.27</sub> Mn <sub>1.27</sub> Fe <sub>0.46</sub> O <sub>4</sub> | 0.401 | 0.213 | 0.058 |
| Atomic<br>Percentage(%) | Co <sub>3</sub> O <sub>4</sub>                                          | 17.31 | -     | -     |
|                         | Mn <sub>3</sub> O <sub>4</sub>                                          | -     | 17.24 | -     |
|                         | Co <sub>2</sub> MnO <sub>4</sub>                                        | 20.88 | 13.70 | -     |

|                                                              |       |      |      |
|--------------------------------------------------------------|-------|------|------|
| $\text{Co}_{1.27}\text{Mn}_{1.27}\text{Fe}_{0.46}\text{O}_4$ | 10.04 | 5.34 | 1.45 |
|--------------------------------------------------------------|-------|------|------|

Table S3. The content of different oxygen groups

| XPS    | Atomic Percentage (%)                                        |       |                   |       |
|--------|--------------------------------------------------------------|-------|-------------------|-------|
|        | -O                                                           | -OH   | -H <sub>2</sub> O |       |
| Before | $\text{Co}_3\text{O}_4$                                      | 12.24 | 45.06             | 42.69 |
|        | $\text{Mn}_3\text{O}_4$                                      | 74.64 | 18.97             | 6.39  |
|        | $\text{Co}_2\text{MnO}_4$                                    | 67.05 | 23.75             | 9.20  |
|        | $\text{Co}_{1.27}\text{Mn}_{1.27}\text{Fe}_{0.46}\text{O}_4$ | 62.10 | 31.01             | 6.90  |
| After  | $\text{Co}_3\text{O}_4$                                      | 13.81 | 75.78             | 10.41 |
|        | $\text{Mn}_3\text{O}_4$                                      | 25.85 | 41.81             | 32.34 |
|        | $\text{Co}_2\text{MnO}_4$                                    | 12.62 | 72.66             | 14.72 |
|        | $\text{Co}_{1.27}\text{Mn}_{1.27}\text{Fe}_{0.46}\text{O}_4$ | 19.51 | 38.76             | 41.73 |

## 6. Electrochemistry

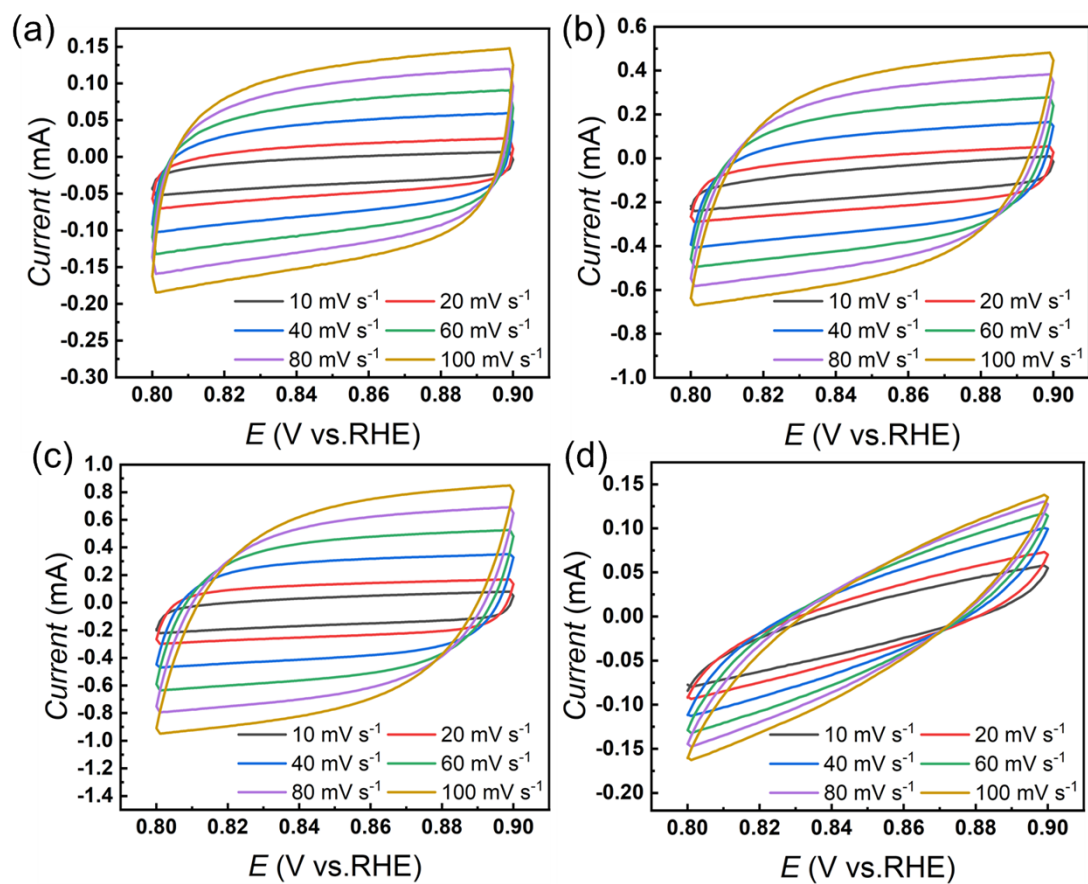

**Figure S4.** (a-d) CV of  $\text{Co}_3\text{O}_4$ ,  $\text{Mn}_3\text{O}_4$ ,  $\text{Co}_2\text{MnO}_4$  and  $\text{Co}_{1.27}\text{Mn}_{1.27}\text{Fe}_{0.46}\text{O}_4/\text{CP}$  at different scan rates (10, 20, 40, 60, 80, and 100  $\text{mV s}^{-1}$ ) in 0.8 - 0.9 V in 1 M  $\text{HClO}_4$ .



Theoretically, a simple electrochemical redox reaction can be described by the Butler-Volmer equation:

$$j = j_0 \{ \exp(-\alpha f \eta) - \exp[(1 - \alpha) f \eta] \} \quad (1)$$

By taking logarithm of Eq. 1, and assuming the reverse reaction negligible, there is

$$\log j = \log j_0 + \alpha f \eta / 2.303 RT \quad (2)$$

where  $\alpha$  is the transfer coefficient,  $f$  denotes  $F/RT$  ( $F$ : the Faraday's constant,  $R$ : the universal gas constant,  $T$ : the absolute temperature), and  $j_0$  is the exchange current density. Therefore, by plotting the  $\log j$  vs.  $\eta$  plot, the  $j_0$  can be acquired from the intercept.

The  $j_0$  of MOR for  $\text{Co}_3\text{O}_4$ ,  $\text{Mn}_3\text{O}_4$ ,  $\text{Co}_2\text{MnO}_4$  and  $\text{Co}_{1.27}\text{Mn}_{1.27}\text{Fe}_{0.46}\text{O}_4/\text{CP}$  are  $2.45 \times 10^{-5} \text{ mA cm}^{-2}$ ,  $2.51 \times 10^{-4} \text{ mA cm}^{-2}$ ,  $1.62 \times 10^{-6} \text{ mA cm}^{-2}$  and  $4.58 \times 10^{-8} \text{ mA cm}^{-2}$ , respectively.

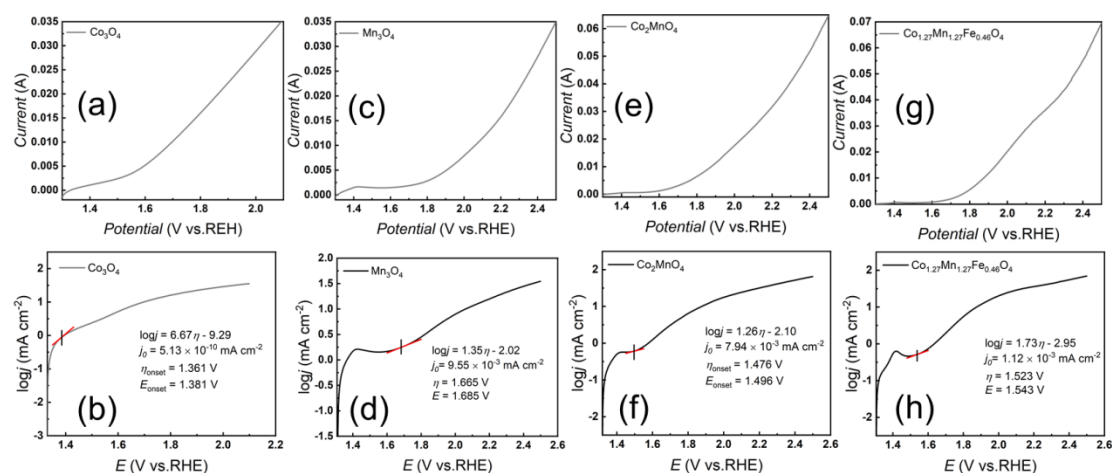

**Figure S5.** The LSV of the  $\text{Co}_3\text{O}_4$ ,  $\text{Mn}_3\text{O}_4$ ,  $\text{Co}_2\text{MnO}_4$  and  $\text{Co}_{1.27}\text{Mn}_{1.27}\text{Fe}_{0.46}\text{O}_4/\text{CP}$  electrodes in 0.5 M  $\text{CH}_3\text{OH}$  + 1 M  $\text{HClO}_4$  (scan rate  $5 \text{ mV s}^{-1}$ ).

**Table S4.** EIS fitting results

---

|                                                              | $R_S/\Omega$ | <i>Error</i> /% | $R_{CT}/\Omega$ | <i>Error</i> /% |
|--------------------------------------------------------------|--------------|-----------------|-----------------|-----------------|
| $\text{Co}_3\text{O}_4$                                      | 10.73        | 0.172           | 9.63            | 1.346           |
| $\text{Mn}_3\text{O}_4$                                      | 17.60        | 0.493           | 218.90          | 3.754           |
| $\text{Co}_2\text{MnO}_4$                                    | 16.54        | 0.578           | 60.51           | 2.539           |
| $\text{Co}_{1.27}\text{Mn}_{1.27}\text{Fe}_{0.46}\text{O}_4$ | 12.85        | 0.295           | 39.87           | 0.834           |
| $\text{Co}_3\text{O}_4$ after galvanostatic OER test         | 11.34        | 0.404           | 10.72           | 1.698           |

---

## 7. Activity comparison

**Table S5.** OER activity comparison in acid

| Catalysts                                                    | Electrolyte                          | $\eta@10$ mA<br>cm <sup>2</sup> /mV | Tafel Slope/<br>mV dec <sup>-1</sup> | Stability/h | References |
|--------------------------------------------------------------|--------------------------------------|-------------------------------------|--------------------------------------|-------------|------------|
| Co <sub>3</sub> O <sub>4</sub> /CP                           | 0.1 M HClO <sub>4</sub>              | 336                                 | 74.7                                 | 28          | This work  |
| Co <sub>3</sub> O <sub>4</sub> @C/CP                         | 0.5 M H <sub>2</sub> SO <sub>4</sub> | 370                                 | 82                                   | 86.8        | [1]        |
| Co <sub>3</sub> O <sub>4</sub> /CeO <sub>2</sub> /FTO        | 0.5 M H <sub>2</sub> SO <sub>4</sub> | 423                                 | 88.1                                 | >50 h       | [2]        |
| Ag-Co <sub>3</sub> O <sub>4</sub>                            | 0.5 M H <sub>2</sub> SO <sub>4</sub> | 680                                 | 219                                  | 12          | [3]        |
| Ir-Co <sub>3</sub> O <sub>4</sub>                            | 0.5 M H <sub>2</sub> SO <sub>4</sub> | 225                                 | 64.1                                 | 130         | [4]        |
| P-Co <sub>3</sub> O <sub>4</sub>                             | 0.1 M HClO <sub>4</sub>              | 400                                 | 98                                   | 30          | [5]        |
| Co <sub>3</sub> S <sub>4</sub> @rGO                          | 0.5 M H <sub>2</sub> SO <sub>4</sub> | 350                                 | 65                                   | >8          | [6]        |
| RuO <sub>2</sub> (Co,Mn) <sub>3</sub> O <sub>4</sub> /<br>CC | 0.5 M H <sub>2</sub> SO <sub>4</sub> | 270                                 | 77                                   | 24          | [7]        |
| HNC-Co                                                       | 0.5 M H <sub>2</sub> SO <sub>4</sub> | 265                                 | 85                                   | -           | [8]        |
| AlNiCoIrMo                                                   | 0.5 M H <sub>2</sub> SO <sub>4</sub> | 233                                 | 55.2                                 | -           | [9]        |

## 8. TEM

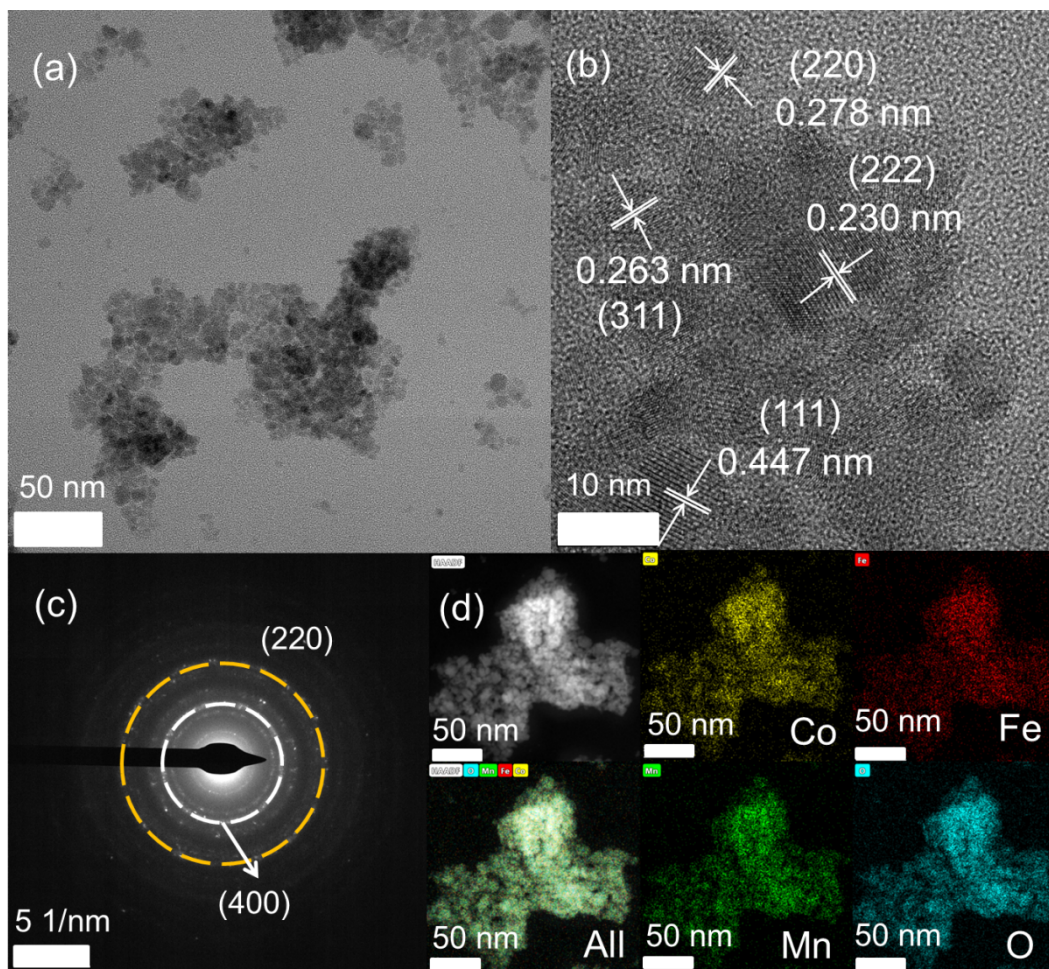

**Figure S6.** (a) TEM image of the  $\text{Co}_{1.27}\text{Mn}_{1.27}\text{Fe}_{0.46}\text{O}_4$ ; (b) High resolution TEM image of the  $\text{Co}_{1.27}\text{Mn}_{1.27}\text{Fe}_{0.46}\text{O}_4$ ; (c) SAED pattern of the  $\text{Co}_{1.27}\text{Mn}_{1.27}\text{Fe}_{0.46}\text{O}_4$ ; (d) Elemental mapping and HAADF image of the  $\text{Co}_{1.27}\text{Mn}_{1.27}\text{Fe}_{0.46}\text{O}_4$ .

## 9. References

- [1] YANG X, LI H, LU A-Y, et al. Highly acid-durable carbon coated  $\text{Co}_3\text{O}_4$  nanoarrays as efficient oxygen evolution electrocatalysts [J]. *Nano Energy*, 2016, 25: 42-50.
- [2] HUANG J, SHENG H, ROSS R D, et al. Modifying redox properties and local bonding of  $\text{Co}_3\text{O}_4$  by  $\text{CeO}_2$  enhances oxygen evolution catalysis in acid [J]. *Nature communications*, 2021, 12(1): 3036.
- [3] YAN K-L, CHI J-Q, XIE J-Y, et al. Mesoporous Ag-doped  $\text{Co}_3\text{O}_4$  nanowire arrays supported on FTO as efficient electrocatalysts for oxygen evolution reaction in acidic media [J]. *Renewable Energy*, 2018, 119: 54-61.
- [4] XIE Y, SU Y, QIN H, et al. Ir-doped  $\text{Co}_3\text{O}_4$  as efficient electrocatalyst for acidic oxygen evolution reaction [J]. *International Journal of Hydrogen Energy*, 2023.
- [5] SHANG F, HE H, LI P, et al. PO6 geometric configuration unit enhanced electrocatalytic performance of  $\text{Co}_3\text{O}_4$  in acidic oxygen evolution [J]. *Journal of colloid and interface science*, 2023, 641: 329-37.
- [6] KUMAR R S, KARTHIKEYAN S, RAMAKRISHNAN S, et al. Anion dependency of spinel type cobalt catalysts for efficient overall water splitting in an acid medium [J]. *Chemical Engineering Journal*, 2023, 451: 138471.
- [7] NIU S, KONG X-P, LI S, et al. Low Ru loading  $\text{RuO}_2/(\text{Co}, \text{Mn})_3\text{O}_4$  nanocomposite with modulated electronic structure for efficient oxygen evolution reaction in acid [J]. *Applied Catalysis B: Environmental*, 2021, 297: 120442.
- [8] SU H, ZHAO X, CHENG W, et al. Hetero-N-coordinated Co single sites with high turnover frequency for efficient electrocatalytic oxygen evolution in an acidic medium [J]. *ACS Energy Letters*, 2019, 4(8): 1816-22.
- [9] JIN Z, LV J, JIA H, et al. Nanoporous Al-Ni-Co-Ir-Mo high-entropy alloy for record-high water splitting activity in acidic environments [J]. *Small*, 2019, 15(47): 1904180.
